# Supplementary material for: Insulin resistance based on postglucose load measure is associated with prevalence and burden of cerebral small vessel disease
Source: HighWire-hosted journal article supplement (doi:10.1136/bmjdrc-2022-002897), 2022-10-01

### Online Supplementary material

Supplementary Detailed methods

Supplementary Table S1. Baseline characteristics of patients with estimated insulin resistance assessed by  $ISI_{0,120}$ .

Supplementary Table S2. Baseline characteristics of patients with estimated insulin resistance assessed by HOMA-IR.

Figure S1. Flow chart.

## Detailed methods

### Information on MRI scans

Magnetic Resonance Imaging (MRI) scans were obtained on a 3.0T scanner (Ingenia 3.0T, Philips, Best, The Netherlands) at baseline and included three-dimensional T1-weighted magnetization-prepared rapid-acquisition gradient-echo (3D T1w MPRAGE), two-dimensional T2-weighted (2D T2w), two-dimensional fluid-attenuated inversion recovery (2D FLAIR), and susceptibility-weighted imaging (SWI). The parameters of 3D T1w MPRAGE are as follows: TE=3.0ms, TR=6.7ms, TI=880ms, shot interval=2000ms, Flip angle=8°, with voxel of 1.00×1.00×1.00 mm and scan time of 4 min 30 sec. The parameters of T2w imaging are as follows: TE=105ms, TR=2500ms, SPIR fat suppression, with voxel of 0.51×0.51×6.50mm and scan time of 1 min 5 sec. The parameters of FLAIR imaging are as follows: TE=110ms, TR=7000ms, TI=2300ms, SPIR fat suppression, with voxel of 0.53×0.53×6.50mm and scan time of 2 min 27 sec. The parameters of SWI are as follows: first TE=7.2ms, echo spacing = 6.2ms, 5 echoes, Flip angle=17°, TR =37ms, with voxel of 0.63×0.63×0.80mm and scan time of 2 min 20 sec.

Supplementary Table S1. Baseline characteristics of patients with estimated insulin resistance assessed by ISI<sub>0,120</sub>

| Baseline characteristics                                  | ISI <sub>0,120</sub>     |                          |                          |                          | P value |
|-----------------------------------------------------------|--------------------------|--------------------------|--------------------------|--------------------------|---------|
|                                                           | Q1 (n=687)*              | Q2(n=684)                | Q3(n=688)                | Q4(n=686)                |         |
| Age (mean ± SD)                                           | 61.9±6.7                 | 61.0±6.7                 | 60.3±6.4                 | 60.5±6.4                 | <0.001  |
| Male (n, %)                                               | 297 (43.2)               | 297 (43.4)               | 296 (43.0)               | 402 (58.6)               | <0.001  |
| SBP, mmHg (mean ± SD)                                     | 133.9±15.1               | 129.3±15.5               | 126.7±16.1               | 124.2±16.2               | <0.001  |
| DBP, mmHg (mean ± SD)                                     | 77.3±9.0                 | 75.4±9.1                 | 74.5±9.0                 | 73.0±9.1                 | <0.001  |
| BMI (kg/m <sup>2</sup> ), mean ± SD)                      | 25.1±3.1                 | 23.8±2.8                 | 23.5±2.8                 | 22.4±2.8                 | <0.001  |
| Medical history                                           |                          |                          |                          |                          |         |
| Hypertension                                              | 411 (59.8)               | 286 (41.8)               | 228(33.1)                | 188(27.4)                | <0.001  |
| Coronary artery disease                                   | 5 (0.7)                  | 1 (0.2)                  | 2(0.3)                   | 1(0.2)                   | 0.19    |
| Atrial fibrillation                                       | 9 (1.3)                  | 7 (1.0)                  | 5(0.7)                   | 2(0.3)                   | 0.20    |
| Dyslipidemia                                              | 194 (28.2)               | 135 (19.7)               | 113(16.4)                | 72(10.5)                 | <0.001  |
| Stroke                                                    | 25 (3.6)                 | 20 (2.9)                 | 7(1.0)                   | 14(2.0)                  | 0.01    |
| Current drinker                                           | 98 (14.3)                | 122 (17.8)               | 127(18.5)                | 179(26.1)                | <0.001  |
| Current smoker                                            | 97 (14.1)                | 112 (16.4)               | 137(19.9)                | 225(32.8)                | <0.001  |
| Fasting glucose (mmol/L), median (IQR)                    | 5.94 (5.49-6.56)         | 5.52 (5.25-5.87)         | 5.38 (5.09-5.73)         | 5.32 (5.02-5.60)         | <0.001  |
| 2h-OGTT glucose (mmol/L), median (IQR)                    | 10.38 (9.06-12.49)       | 7.71 (7.06-8.46)         | 6.55 (6.02-7.15)         | 5.43 (4.65-6.04)         | <0.001  |
| HbA1c (%), median (IQR)                                   | 5.90 (5.60-6.30)         | 5.70 (5.50-5.90)         | 5.60 (5.40-5.80)         | 5.60 (5.40-5.80)         | <0.001  |
| Total Cholesterol (mmol/L), mean ± SD                     | 5.40±1.03                | 5.30±0.99                | 5.27±0.93                | 5.18±0.94                | <0.001  |
| LDL-C (mmol/L), mean ± SD                                 | 2.83±0.82                | 2.80±0.82                | 2.80±0.75                | 2.75±0.76                | 0.18    |
| HDL-C (mmol/L), mean ± SD                                 | 1.28±0.31                | 1.35±0.31                | 1.39±0.33                | 1.48±0.37                | <0.001  |
| Estimated GFR <sub>cr</sub> (ml/min/1.73 m <sup>2</sup> ) | 103.67<br>(95.87-110.20) | 104.52<br>(96.25-110.25) | 105.74<br>(97.64-110.58) | 104.38<br>(96.82-110.01) | 0.22    |
| Medications                                               |                          |                          |                          |                          |         |
| Antihypertensive                                          | 267 (38.9)               | 182 (26.6)               | 131 (19.0)               | 99 (14.4)                | <0.001  |

|                |          |          |          |          |        |
|----------------|----------|----------|----------|----------|--------|
| Lipid-lowering | 40 (5.8) | 24 (3.5) | 14 (2.0) | 14 (2.0) | <0.001 |
| Antiplatelet   | 27 (3.9) | 16 (2.3) | 6 (0.9)  | 8 (1.2)  | <0.001 |
| Anticoagulant  | 0        | 2(0.3)   | 0        | 0        | 0.11   |

ISI indicates insulin sensitivity index; SBP, systolic blood pressure; DBP, diastolic blood pressure; BMI, body mass index; LDL-C, low-density lipoprotein cholesterol; HDL-C, high-density lipoprotein cholesterol; HbA1c, hemoglobin A1c; GFR<sub>cr</sub>, creatinine-based glomerular filtration rate; SD, standard deviation; IQR, interquartile range.

\*Quartiles of ISI<sub>0,120</sub>: Q1≤54.30; Q2,54.30-72.88; Q3, 72.88-97.08; Q4≥97.08.

Supplementary Table S2. Baseline characteristics of patients with estimated insulin resistance assessed by HOMA-IR

| Baseline characteristics                                  | HOMA-IR                  |                          |                          |                          | P value |
|-----------------------------------------------------------|--------------------------|--------------------------|--------------------------|--------------------------|---------|
|                                                           | Q1 (n=671)*              | Q2(n=696)                | Q3(n=683)                | Q4(n=702)                |         |
| Age (mean ± SD)                                           | 61.7±6.7                 | 60.7±6.6                 | 60.6±6.5                 | 60.6±6.5                 | 0.003   |
| Male (n, %)                                               | 430 (64.1)               | 334 (48.0)               | 273 (40.0)               | 258 (36.8)               | <0.001  |
| SBP, mmHg (mean ± SD)                                     | 124.3±16.4               | 127.6±16.2               | 129.6±16.2               | 132.4±14.6               | <0.001  |
| DBP, mmHg (mean ± SD)                                     | 72.7±9.1                 | 74.9±9.2                 | 75.3±8.9                 | 77.2±8.9                 | <0.001  |
| BMI (kg/m <sup>2</sup> ), mean ± SD)                      | 21.6±2.3                 | 23.1±2.5                 | 24.2±2.7                 | 25.8±2.9                 | <0.001  |
| Medical history                                           |                          |                          |                          |                          |         |
| Hypertension                                              | 176 (26.2)               | 258 (37.1)               | 285 (41.7)               | 397 (56.6)               | <0.001  |
| Coronary artery disease                                   | 4 (0.6)                  | 2 (0.3)                  | 2 (0.3)                  | 2 (0.3)                  | 0.72    |
| Atrial fibrillation                                       | 2 (0.3)                  | 6 (0.9)                  | 5 (0.7)                  | 10 (1.4)                 | 0.15    |
| Dyslipidemia                                              | 50 (7.5)                 | 121 (17.4)               | 158 (23.1)               | 186 (26.5)               | <0.001  |
| Stroke                                                    | 14 (2.1)                 | 18 (2.6)                 | 18 (2.6)                 | 16 (2.3)                 | 0.90    |
| Current drinker                                           | 207 (30.9)               | 128 (18.4)               | 102 (14.9)               | 89 (12.7)                | <0.001  |
| Current smoker                                            | 217 (32.3)               | 152 (21.8)               | 105 (15.4)               | 97 (13.8)                | <0.001  |
| Fasting glucose (mmol/L), median (IQR)                    | 5.21 (4.95-5.50)         | 5.45 (5.17-5.76)         | 5.55 (5.27-5.94)         | 5.87 (5.52-6.36)         | <0.001  |
| 2h-OGTT glucose (mmol/L), median (IQR)                    | 10.38 (9.06-12.49)       | 7.71 (7.06-8.46)         | 6.55 (6.02-7.15)         | 5.43 (4.65-6.04)         | <0.001  |
| HbA1c (%), median (IQR)                                   | 5.90 (5.60-6.30)         | 5.70 (5.50-5.90)         | 5.60 (5.40-5.80)         | 5.60 (5.40-5.80)         | <0.001  |
| Total Cholesterol (mmol/L), mean ± SD                     | 5.08±0.95                | 5.35±0.96                | 5.42±0.98                | 5.31±0.98                | <0.001  |
| LDL-C (mmol/L), mean ± SD                                 | 2.65±0.74                | 2.85±0.79                | 2.88±0.78                | 2.80±0.81                | <0.001  |
| HDL-C (mmol/L), mean ± SD                                 | 1.51±0.37                | 1.43±0.36                | 1.32±0.29                | 1.25±0.28                | <0.001  |
| Estimated GFR <sub>cr</sub> (ml/min/1.73 m <sup>2</sup> ) | 104.13<br>(97.19-110.03) | 105.19<br>(97.08-110.46) | 103.89<br>(96.21-110.14) | 104.89<br>(94.71-110.63) | 0.70    |
| Medications                                               |                          |                          |                          |                          |         |
| Antihypertensive                                          | 84 (12.5)                | 148 (21.3)               | 181 (26.5)               | 267 (38.0)               | <0.001  |

---

|                |         |          |          |          |        |
|----------------|---------|----------|----------|----------|--------|
| Lipid-lowering | 7 (1.0) | 19 (2.7) | 28 (4.1) | 38 (5.4) | <0.001 |
| Antiplatelet   | 6 (0.9) | 11 (1.6) | 14 (2.1) | 26 (3.7) | 0.002  |
| Anticoagulants | 0       | 1 (0.1)  | 0        | 1 (0.1)  | 0.59   |

---

HOMA-IR indicates Homeostatic Model Assessment for Insulin Resistance; SBP, systolic blood pressure; DBP, diastolic blood pressure; BMI, body mass index; LDL-C, low-density lipoprotein cholesterol; HDL-C, high-density lipoprotein cholesterol; HbA1c, hemoglobin A1c; GFRcr, creatinine-based glomerular filtration rate; SD, standard deviation; IQR, interquartile range.

\*Quartiles of HOMA-IR: Q1≤1.07; Q2, 1.07-1.55; Q3, 1.55-2.24; Q4≥2.24.

## Supplementary Figure S1. Flow chart.

MRI indicates magnetic resonance imaging; cSVD, cerebral small vessel disease.

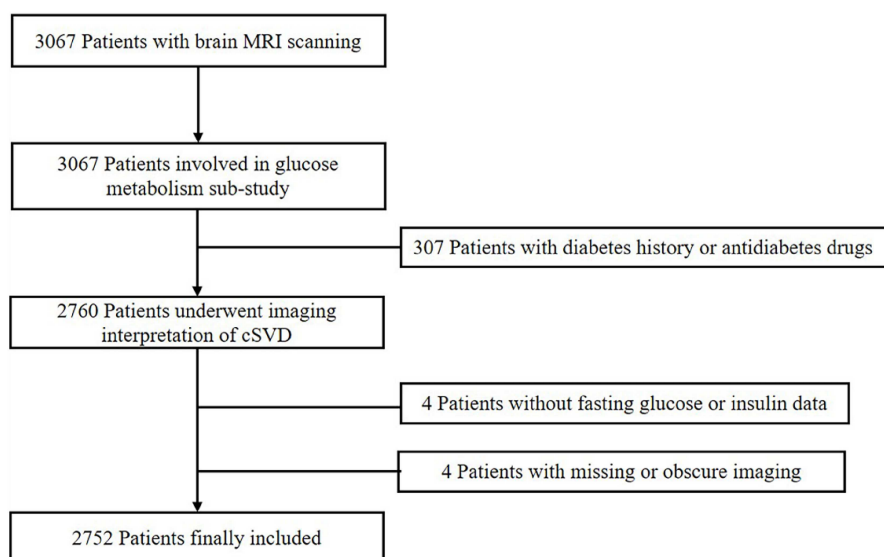

Supplement: bmjdrc-2022-002897supp001_data_supplement.pdf [file bmjdrc-2022-002897supp001_data_supplement.pdf]
